# Supplementary material for: Species-Specific Level Variation in Polyamines in Coniferous and Deciduous Woody Plant Species in Urban Areas
Source: MDPI journal article supplement (doi:10.3390/horticulturae9101157), 2023-10-22
Supplement: s1 [file s1]

## Species-specific level variation of polyamines in coniferous and deciduous woody plant species in urban areas

Table S1. Diameter at breast height and height of selected tree specimens

| Species               | Diameter at breast height (cm) | Tree height (m) |
|-----------------------|--------------------------------|-----------------|
| <b>Abies concolor</b> | 26.25                          | 15.7            |
| Abies pinsapo         | 41.1                           | 13.4            |
| Cedrus atlantica      | 36.35                          | 18.1            |
| Picea abies           | 18.5                           | 8,26            |
| Picea omorika         | 26.8                           | 10.9            |
| Picea pungens         | 42.5                           | 13.8            |
| Pinus nigra           | 30.75                          | 13.1            |
| Pinus wallichiana     | 32.5                           | 7.8             |
| Taxodium distichum    | 52.5                           | 18.2            |
| Taxus baccata         | 15.95                          | 4.1             |
| Thuja occidentalis    | 19.75                          | 11.2            |
| Thuja orientalis      | 24                             | 5.7             |
| Acer pseudoplatanus   | 33.6                           | 12.7            |
| Betula pendula        | 43.4                           | 15.2            |
| Celtis australis      | 62.2                           | 21.4            |
| Corylus colurna       | 50.5                           | 17.6            |
| Ginkgo biloba         | 156                            | 14.2            |
| Juglans regia         | 30.15                          | 10              |
| Morus alba            | 32.5                           | 8.7             |
| Populus alba          | 32.4                           | 12.3            |
| Quercus rubra         | 53.35                          | 16.4            |
| Salix alba            | 35.6                           | 7.3             |
| Sofora japonica       | 92.55                          | 19.8            |
| Tilia grandifolia     | 64.75                          | 20.1            |
